# Supplementary material
Source: PubMed Central journal article supplement (PMC7942760)
Supplement: NIHMS1646473-supplement-1.pdf [file NIHMS1646473-supplement-1.pdf]

((Supporting Information can be included here using this template))

Copyright WILEY-VCH Verlag GmbH & Co. KGaA, 69469 Weinheim, Germany, 2018.

## Supporting Information

### **Robust and Gradient Thickness Porous Membranes for *In Vitro* Modeling of Physiological Barriers**

*Shayan Gholizadeh<sup>1,2</sup>, Zahra Allahyari<sup>1,2</sup>, Robert Carter<sup>3</sup>, Luis F. Delgadillo<sup>4</sup>, Marine Blaquiere<sup>5</sup>, Frederic Nougier-Morin<sup>5</sup>, Nicola Marchi<sup>5</sup>, and Thomas R. Gaboriski<sup>\*1,2,4</sup>*

*Corresponding author: Thomas R. Gaboriski email: tom.gaboriski@rit.edu*

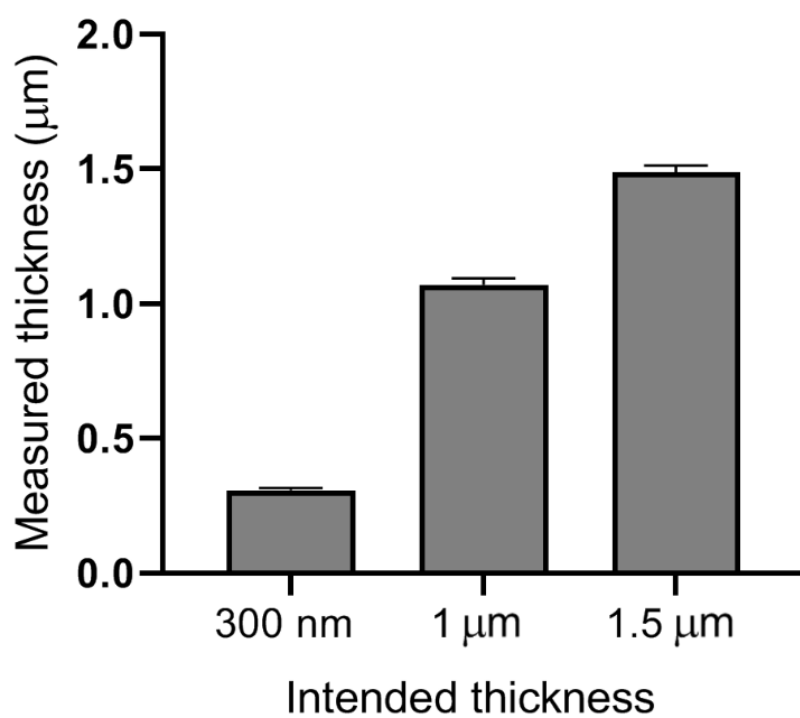

Figure S1. Thickness measurement across three full 6-inch wafers with different thicknesses, showing homogenous membrane coating across the whole wafer for a three thicknesses. Data represent mean values ( $n=5$ ) and error bars represent standard deviations.

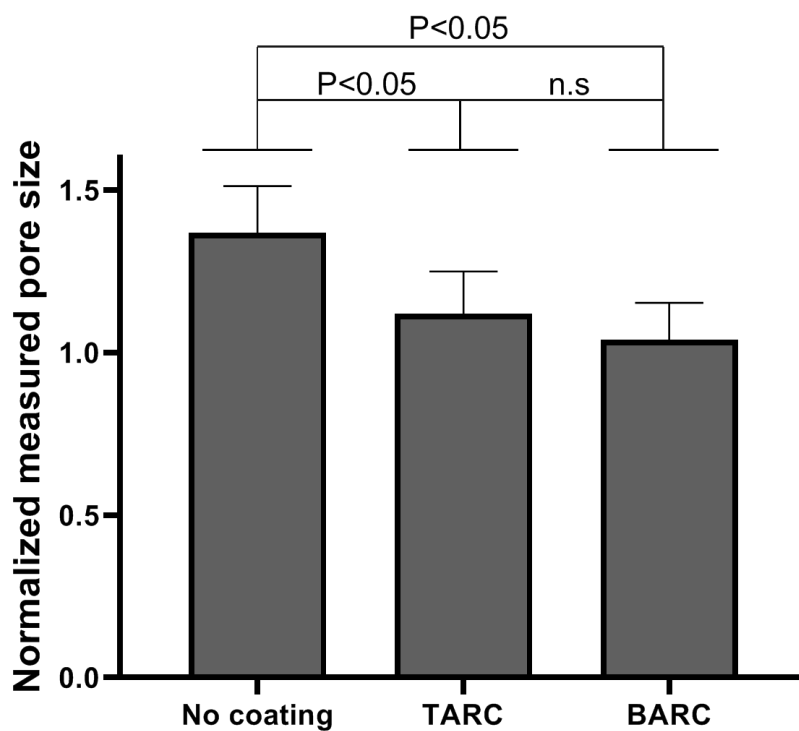

Figure S2. Effect of anti-reflective coating on ultrathin porous parylene C (UPP) membrane pore expansion after patterning and etching. The use of TARC on the photoresist layer resulted in significantly lower pore size (indicative of size fidelity to the mask design), while there was no significant difference between applying TARC and BARC. Considering the simplicity of using TARC, this is highly desirable.

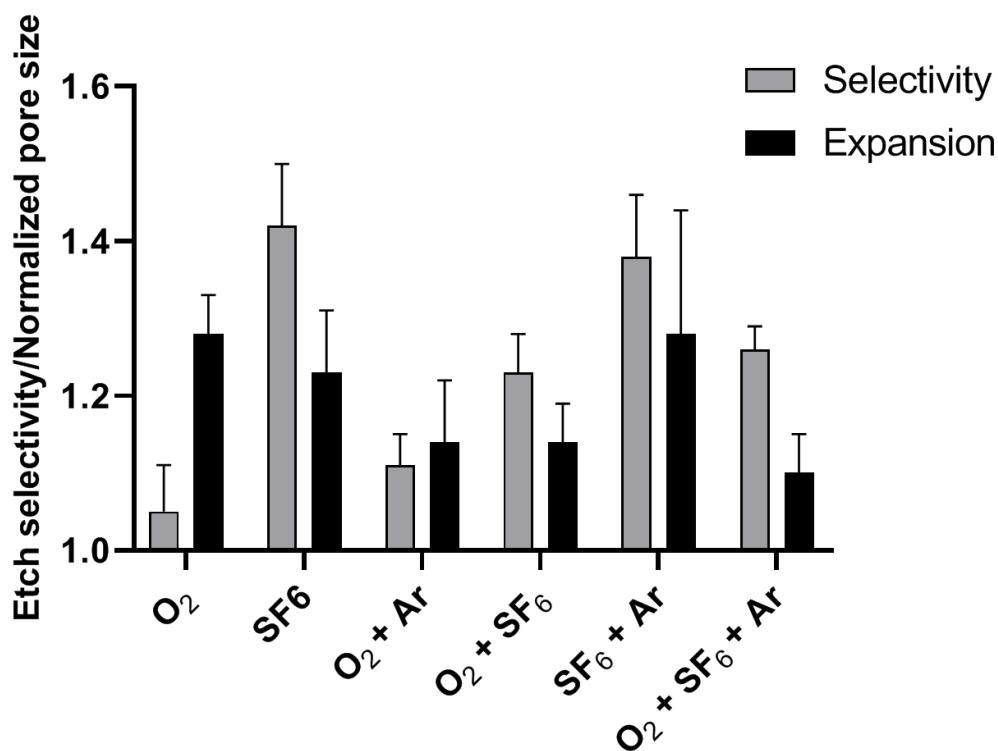

Figure S3. Parylene to photoresist etching selectivity and pore size expansion under different etching recipes. Different combinations of O<sub>2</sub> (50 sccm), Ar (5 sccm), and SF<sub>6</sub> (5 sccm) were tested to obtain the highest selectivity of parylene etching rate divided by photoresist etching rate and lowest pore expansion characterized by SEM. Although SF<sub>6</sub> and SF<sub>6</sub> + Ar led to the highest selectivity, they led to undesirable pore expansion. O<sub>2</sub> + SF<sub>6</sub> + Ar resulted in the best pore expansion performance while yielding fairly good selectivity.

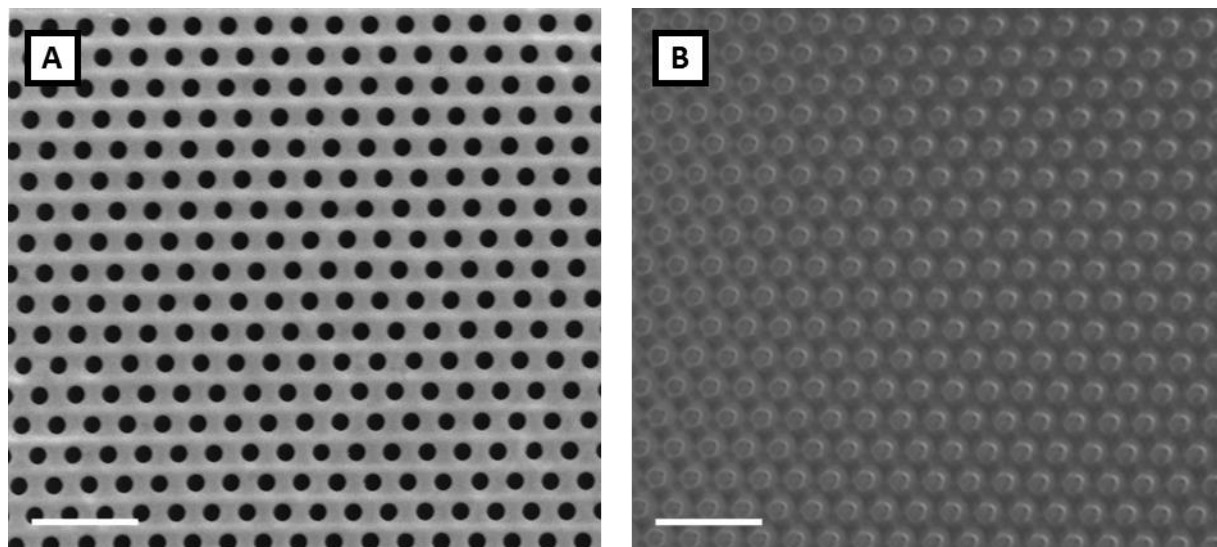

Figure S4. A) Low magnification SEM and B) phase-contrast images of UPP membranes, showing consistent pore patterning in larger scales (scale bars = 50  $\mu\text{m}$ )

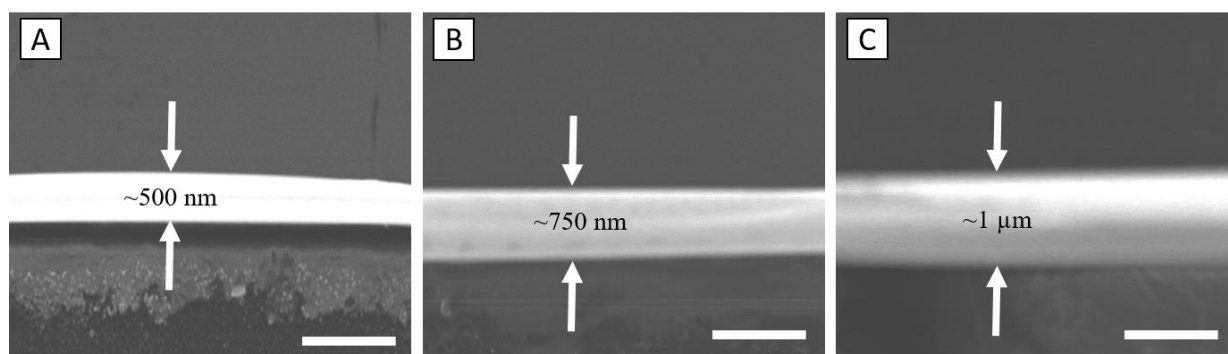

Figure S5. Cross-sectional SEM images of a thickness gradient membrane, correlating to the positions in Figure 3C across a 2-cm long UPP membrane at position 0 cm (A), 1 cm (B) and 2 cm (C) (scale bars = 1  $\mu\text{m}$ ).

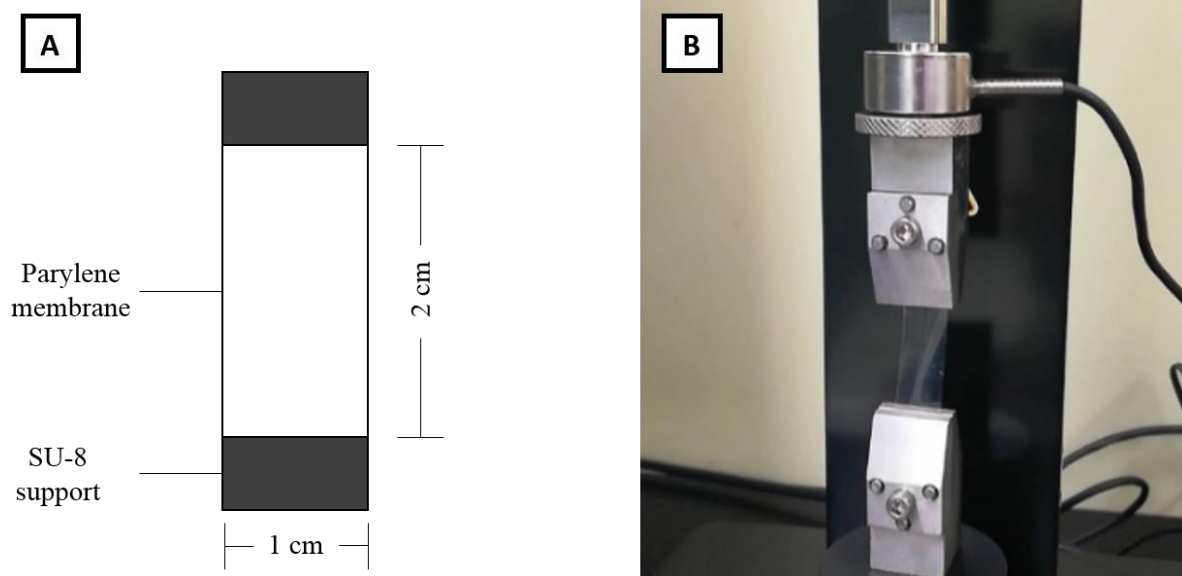

Figure S6. Mechanical characterization setup. A) Blocks of SU-8 were patterned on the UPP membrane before membrane lift-off. B) Upon membrane lift-off, SU-8 supported membrane is carefully transferred to the tool with tweezers and SU-8 supports were used as gripping regions in the CellScale® UniVert Biomaterial Tester.

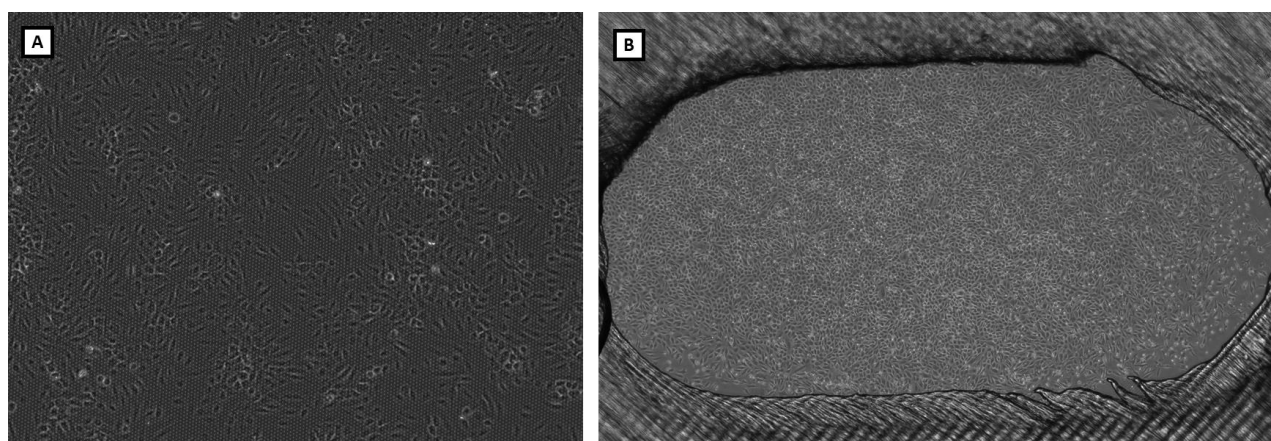

Figure S7. (A) Representative phase contrast image of analyzed samples for investigating cell adhesion on RIE-treated UPP membranes. B) Phase contrast image of long-term endothelial cell culture (7 days) on the flow-based prototype culture device
